# Supplementary material for: Effect of high purity molybdenum oxide(vi) on crystal growth and OLED technology
Source: Royal Society of Chemistry journal article supplement (doi:10.1039/d1ce01322j), 2021-01-01
Supplement: d1ce01322j1.pdf [file d1ce01322j1.pdf]

## Supplementary

### Effect of high pure molybdenum oxide (VI) on crystal growth and OLED technology

A. Khomyakov, E. Sukhanova, E. Mozhevitina, M. Zykhova, A. Barkanov, R. Avetisov, A. Yurkin, K. Subbotin, O. Lis, I. Avetissov

Table S1– Impurity content in commercial MoO<sub>3</sub> preparations from different manufactures determined by ICP-MS: Peterburgsky Krasny Himik, Ltd., Chimreaktiv CJSC, NPF Baltic Manufacture Ltd.

| Elements  | Peterburgsky Krasny Himik, Ltd. | Chimreaktiv CJSC»     | NPF Baltic Manufacture Ltd. | Elements  | Peterburgsky Krasny Himik, Ltd.» | Chimreaktiv CJSC»     | NPF Baltic Manufacture Ltd.» |
|-----------|---------------------------------|-----------------------|-----------------------------|-----------|----------------------------------|-----------------------|------------------------------|
|           | wt.%                            | wt.%                  | wt.%                        |           | wt.%                             | wt.%                  | wt.%                         |
| <b>Li</b> | $< 3,5 \cdot 10^{-6}$           | $1,3 \cdot 10^{-4}$   | $< 3,5 \cdot 10^{-6}$       | <b>Sb</b> | $8,2 \cdot 10^{-6}$              | $1,1 \cdot 10^{-5}$   | $2,8 \cdot 10^{-4}$          |
| <b>Be</b> | $< 2,1 \cdot 10^{-7}$           | $< 2,3 \cdot 10^{-6}$ | $< 2,0 \cdot 10^{-6}$       | <b>Te</b> | $< 1,6 \cdot 10^{-5}$            | $< 3,9 \cdot 10^{-5}$ | $1,7 \cdot 10^{-4}$          |
| <b>B</b>  | $< 2,1 \cdot 10^{-6}$           | $< 3,6 \cdot 10^{-6}$ | $< 6,0 \cdot 10^{-6}$       | <b>Cs</b> | $6,4 \cdot 10^{-5}$              | $3,8 \cdot 10^{-5}$   | $< 2,7 \cdot 10^{-6}$        |
| <b>Na</b> | $7,9 \cdot 10^{-4}$             | $1,4 \cdot 10^{-3}$   | $9,4 \cdot 10^{-4}$         | <b>Ba</b> | $< 3,5 \cdot 10^{-6}$            | $1,4 \cdot 10^{-4}$   | $6,3 \cdot 10^{-4}$          |
| <b>Mg</b> | $< 1,0 \cdot 10^{-5}$           | $< 3,4 \cdot 10^{-5}$ | $4,7 \cdot 10^{-3}$         | <b>La</b> | $< 9,7 \cdot 10^{-8}$            | $4,6 \cdot 10^{-7}$   | $< 1,3 \cdot 10^{-7}$        |
| <b>Al</b> | $< 2,2 \cdot 10^{-5}$           | $6,7 \cdot 10^{-4}$   | $< 1,9 \cdot 10^{-5}$       | <b>Ce</b> | $1,0 \cdot 10^{-4}$              | $3,2 \cdot 10^{-7}$   | $< 2,1 \cdot 10^{-7}$        |
| <b>Si</b> | $5,2 \cdot 10^{-3}$             | $< 6,3 \cdot 10^{-5}$ | $1,9 \cdot 10^{-3}$         | <b>Pr</b> | $7,3 \cdot 10^{-6}$              | $3,1 \cdot 10^{-6}$   | $< 2,6 \cdot 10^{-7}$        |
| <b>K</b>  | $8,4 \cdot 10^{-3}$             | $9,8 \cdot 10^{-3}$   | $< 3,6 \cdot 10^{-5}$       | <b>Nd</b> | $1,4 \cdot 10^{-7}$              | $2,4 \cdot 10^{-5}$   | $6,5 \cdot 10^{-6}$          |
| <b>Ca</b> | $< 2,5 \cdot 10^{-5}$           | $< 3,6 \cdot 10^{-5}$ | $< 3,7 \cdot 10^{-5}$       | <b>Sm</b> | $< 2,1 \cdot 10^{-8}$            | $< 2,8 \cdot 10^{-8}$ | $1,7 \cdot 10^{-6}$          |
| <b>Sc</b> | $< 9,3 \cdot 10^{-7}$           | $< 3,2 \cdot 10^{-6}$ | $< 1,0 \cdot 10^{-6}$       | <b>Eu</b> | $< 2,1 \cdot 10^{-8}$            | $< 2,8 \cdot 10^{-8}$ | $5,4 \cdot 10^{-8}$          |

| Elements  | Peterburgsky Krasny Himik, Ltd. | Chimreaktiv CJSC»     | NPF Baltic Manufacture Ltd. | Elements  | Peterburgsky Krasny Himik, Ltd.» | Chimreaktiv CJSC»     | NPF Baltic Manufacture Ltd.» |
|-----------|---------------------------------|-----------------------|-----------------------------|-----------|----------------------------------|-----------------------|------------------------------|
|           | wt.%                            | wt.%                  | wt.%                        |           | wt.%                             | wt.%                  | wt.%                         |
| <b>V</b>  | $3,3 \cdot 10^{-6}$             | $2,0 \cdot 10^{-5}$   | $2,3 \cdot 10^{-4}$         | <b>Gd</b> | $< 9,8 \cdot 10^{-8}$            | $< 2,8 \cdot 10^{-8}$ | $< 2,0 \cdot 10^{-7}$        |
| <b>Cr</b> | $1,4 \cdot 10^{-4}$             | $3,6 \cdot 10^{-4}$   | $5,5 \cdot 10^{-5}$         | <b>Tb</b> | $< 6,4 \cdot 10^{-7}$            | $1,2 \cdot 10^{-7}$   | $< 8,7 \cdot 10^{-8}$        |
| <b>Mn</b> | $1,2 \cdot 10^{-5}$             | $4,8 \cdot 10^{-5}$   | $8,5 \cdot 10^{-6}$         | <b>Dy</b> | $< 2,1 \cdot 10^{-8}$            | $9,6 \cdot 10^{-7}$   | $< 8,3 \cdot 10^{-8}$        |
| <b>Fe</b> | $1,2 \cdot 10^{-3}$             | $1,4 \cdot 10^{-3}$   | $6,3 \cdot 10^{-5}$         | <b>Ho</b> | $1,4 \cdot 10^{-7}$              | $2,4 \cdot 10^{-7}$   | $< 2,3 \cdot 10^{-8}$        |
| <b>Co</b> | $1,4 \cdot 10^{-4}$             | $4,9 \cdot 10^{-5}$   | $2,2 \cdot 10^{-6}$         | <b>Er</b> | $8,6 \cdot 10^{-8}$              | $3,9 \cdot 10^{-7}$   | $< 1,9 \cdot 10^{-8}$        |
| <b>Ni</b> | $1,8 \cdot 10^{-5}$             | $9,7 \cdot 10^{-5}$   | $2,1 \cdot 10^{-5}$         | <b>Tm</b> | $4,0 \cdot 10^{-8}$              | $1,7 \cdot 10^{-7}$   | $< 2,6 \cdot 10^{-8}$        |
| <b>Cu</b> | $8,4 \cdot 10^{-5}$             | $6,1 \cdot 10^{-5}$   | $3,1 \cdot 10^{-5}$         | <b>Yb</b> | $< 2,1 \cdot 10^{-8}$            | $< 7,4 \cdot 10^{-8}$ | $< 1,9 \cdot 10^{-8}$        |
| <b>Zn</b> | $< 3,6 \cdot 10^{-6}$           | $< 1,2 \cdot 10^{-5}$ | $< 1,3 \cdot 10^{-5}$       | <b>Lu</b> | $< 1,4 \cdot 10^{-7}$            | $< 5,8 \cdot 10^{-7}$ | $< 1,2 \cdot 10^{-7}$        |
| <b>Ga</b> | $< 5,8 \cdot 10^{-7}$           | $< 3,4 \cdot 10^{-7}$ | $3,0 \cdot 10^{-5}$         | <b>Hf</b> | $< 3,9 \cdot 10^{-7}$            | $3,1 \cdot 10^{-7}$   | $< 3,2 \cdot 10^{-7}$        |
| <b>Ge</b> | $< 1,1 \cdot 10^{-6}$           | $< 8,1 \cdot 10^{-7}$ | $< 6,8 \cdot 10^{-7}$       | <b>Ta</b> | $< 2,8 \cdot 10^{-7}$            | $< 1,2 \cdot 10^{-7}$ | $2,3 \cdot 10^{-7}$          |
| <b>As</b> | $< 1,9 \cdot 10^{-5}$           | $< 8,2 \cdot 10^{-6}$ | $< 2,1 \cdot 10^{-5}$       | <b>W</b>  | $1,3 \cdot 10^{-2}$              | $5,5 \cdot 10^{-3}$   | $6,4 \cdot 10^{-2}$          |
| <b>Se</b> | $< 7,8 \cdot 10^{-6}$           | $< 3,7 \cdot 10^{-5}$ | $< 2,4 \cdot 10^{-5}$       | <b>Re</b> | $< 2,1 \cdot 10^{-8}$            | $6,4 \cdot 10^{-7}$   | $2,8 \cdot 10^{-6}$          |
| <b>Rb</b> | $4,1 \cdot 10^{-4}$             | $2,6 \cdot 10^{-4}$   | $4,1 \cdot 10^{-6}$         | <b>Os</b> | $< 2,1 \cdot 10^{-8}$            | $< 9,3 \cdot 10^{-8}$ | $< 1,9 \cdot 10^{-8}$        |
| <b>Sr</b> | $< 4,5 \cdot 10^{-6}$           | $< 5,8 \cdot 10^{-7}$ | $3,5 \cdot 10^{-5}$         | <b>Ir</b> | $< 2,1 \cdot 10^{-8}$            | $< 2,3 \cdot 10^{-8}$ | $< 1,9 \cdot 10^{-7}$        |
| <b>Y</b>  | $2,9 \cdot 10^{-6}$             | $8,4 \cdot 10^{-6}$   | $< 4,0 \cdot 10^{-7}$       | <b>Pt</b> | $< 3,7 \cdot 10^{-6}$            | $1,8 \cdot 10^{-5}$   | $< 2,0 \cdot 10^{-6}$        |
| <b>Zr</b> | $< 1,3 \cdot 10^{-5}$           | $4,5 \cdot 10^{-5}$   | $< 3,5 \cdot 10^{-5}$       | <b>Au</b> | $< 2,1 \cdot 10^{-8}$            | $< 8,6 \cdot 10^{-7}$ | $< 2,1 \cdot 10^{-7}$        |
| <b>Nb</b> | $3,9 \cdot 10^{-4}$             | $2,1 \cdot 10^{-4}$   | $3,1 \cdot 10^{-4}$         | <b>Hg</b> | $< 8,7 \cdot 10^{-6}$            | $1,6 \cdot 10^{-4}$   | $< 5,3 \cdot 10^{-6}$        |
| <b>Ru</b> | $< 3,8 \cdot 10^{-7}$           | $< 1,2 \cdot 10^{-7}$ | $< 5,9 \cdot 10^{-7}$       | <b>Tl</b> | $5,7 \cdot 10^{-7}$              | $1,2 \cdot 10^{-6}$   | $1,3 \cdot 10^{-5}$          |
| <b>Rh</b> | $2,1 \cdot 10^{-6}$             | $< 1,4 \cdot 10^{-7}$ | $< 2,0 \cdot 10^{-7}$       | <b>Pb</b> | $3,3 \cdot 10^{-6}$              | $2,7 \cdot 10^{-6}$   | $3,4 \cdot 10^{-5}$          |
| <b>Pd</b> | $< 5,6 \cdot 10^{-8}$           | $< 1,1 \cdot 10^{-7}$ | $< 3,2 \cdot 10^{-7}$       | <b>Bi</b> | $3,0 \cdot 10^{-5}$              | $9,4 \cdot 10^{-5}$   | $2,7 \cdot 10^{-5}$          |

| Elements  | Peterburgsky<br>Krasny Himik,<br>Ltd. | Chimreaktiv<br>CJSC»  | NPF Baltic<br>Manufacture Ltd. | Elements  | Peterburgsky<br>Krasny Himik,<br>Ltd.» | Chimreaktiv<br>CJSC»  | NPF Baltic<br>Manufacture Ltd.» |
|-----------|---------------------------------------|-----------------------|--------------------------------|-----------|----------------------------------------|-----------------------|---------------------------------|
|           | wt.%                                  | wt.%                  | wt.%                           |           | wt.%                                   | wt.%                  | wt.%                            |
| <b>Ag</b> | $< 7,7 \cdot 10^{-8}$                 | $< 9,8 \cdot 10^{-7}$ | $< 6,6 \cdot 10^{-7}$          | <b>Th</b> | $< 2,1 \cdot 10^{-8}$                  | $< 1,7 \cdot 10^{-7}$ | $< 1,9 \cdot 10^{-8}$           |
| <b>In</b> | $< 7,0 \cdot 10^{-7}$                 | $7,5 \cdot 10^{-8}$   | $< 6,4 \cdot 10^{-7}$          | <b>U</b>  | $1,4 \cdot 10^{-6}$                    | $1,7 \cdot 10^{-7}$   | $< 8,2 \cdot 10^{-7}$           |
| <b>Sn</b> | $< 8,7 \cdot 10^{-7}$                 | $1,2 \cdot 10^{-4}$   | $1,3 \cdot 10^{-5}$            |           |                                        |                       |                                 |

Table S2 – Impurity content in commercial MoO<sub>3</sub> preparations from NPF Nevsky Khimik Ltd. determined by ICP-MS. (Batch 1 Date 15/10/2015, Batch 2 – Date 18/03/2017)

| Elements  | Batch 1               | Batch 2               | Elements  | Batch 1               | Batch 2               |
|-----------|-----------------------|-----------------------|-----------|-----------------------|-----------------------|
|           | wt.%                  | wt.%                  |           | wt.%                  | wt.%                  |
| <b>Li</b> | $< 1,5 \cdot 10^{-5}$ | $3,4 \cdot 10^{-6}$   | <b>Sb</b> | $1,8 \cdot 10^{-4}$   | $1,1 \cdot 10^{-4}$   |
| <b>Be</b> | $< 1,4 \cdot 10^{-6}$ | $< 2,3 \cdot 10^{-6}$ | <b>Te</b> | $3,0 \cdot 10^{-5}$   | $< 3,9 \cdot 10^{-5}$ |
| <b>B</b>  | $< 5,1 \cdot 10^{-5}$ | $< 3,6 \cdot 10^{-6}$ | <b>Cs</b> | $3,2 \cdot 10^{-5}$   | $1,1 \cdot 10^{-4}$   |
| <b>Na</b> | $6,1 \cdot 10^{-4}$   | $1,1 \cdot 10^{-3}$   | <b>Ba</b> | $3,4 \cdot 10^{-4}$   | $2,7 \cdot 10^{-4}$   |
| <b>Mg</b> | $< 1,5 \cdot 10^{-5}$ | $1,4 \cdot 10^{-3}$   | <b>La</b> | $< 3,5 \cdot 10^{-7}$ | $8,0 \cdot 10^{-7}$   |
| <b>Al</b> | $< 1,7 \cdot 10^{-5}$ | $2,1 \cdot 10^{-4}$   | <b>Ce</b> | $< 2,4 \cdot 10^{-7}$ | $< 1,0 \cdot 10^{-7}$ |
| <b>Si</b> | $< 2,7 \cdot 10^{-4}$ | $< 6,3 \cdot 10^{-5}$ | <b>Pr</b> | $5,3 \cdot 10^{-7}$   | $6,6 \cdot 10^{-7}$   |
| <b>K</b>  | $1,5 \cdot 10^{-3}$   | $1,9 \cdot 10^{-2}$   | <b>Nd</b> | $< 3,4 \cdot 10^{-7}$ | $< 4,4 \cdot 10^{-6}$ |
| <b>Ca</b> | $8,3 \cdot 10^{-4}$   | $2,7 \cdot 10^{-3}$   | <b>Sm</b> | $< 1,6 \cdot 10^{-8}$ | $< 2,8 \cdot 10^{-8}$ |
| <b>Sc</b> | $< 1,5 \cdot 10^{-7}$ | $< 3,2 \cdot 10^{-6}$ | <b>Eu</b> | $< 1,5 \cdot 10^{-7}$ | $9,8 \cdot 10^{-8}$   |
| <b>V</b>  | $1,6 \cdot 10^{-4}$   | $7,5 \cdot 10^{-5}$   | <b>Gd</b> | $< 2,5 \cdot 10^{-7}$ | $< 2,8 \cdot 10^{-8}$ |
| <b>Cr</b> | $7,7 \cdot 10^{-5}$   | $2,4 \cdot 10^{-4}$   | <b>Tb</b> | $< 1,6 \cdot 10^{-7}$ | $< 3,3 \cdot 10^{-7}$ |
| <b>Mn</b> | $< 8,8 \cdot 10^{-7}$ | $1,8 \cdot 10^{-5}$   | <b>Dy</b> | $< 1,6 \cdot 10^{-8}$ | $1,3 \cdot 10^{-7}$   |
| <b>Fe</b> | $< 9,8 \cdot 10^{-6}$ | $1,3 \cdot 10^{-3}$   | <b>Ho</b> | $< 1,2 \cdot 10^{-7}$ | $2,8 \cdot 10^{-8}$   |
| <b>Co</b> | $3,0 \cdot 10^{-7}$   | $7,3 \cdot 10^{-5}$   | <b>Er</b> | $< 8,0 \cdot 10^{-8}$ | $< 2,8 \cdot 10^{-8}$ |
| <b>Ni</b> | $1,9 \cdot 10^{-6}$   | $1,0 \cdot 10^{-4}$   | <b>Tm</b> | $< 5,8 \cdot 10^{-8}$ | $2,7 \cdot 10^{-8}$   |
| <b>Cu</b> | $1,7 \cdot 10^{-4}$   | $8,9 \cdot 10^{-3}$   | <b>Yb</b> | $< 2,4 \cdot 10^{-7}$ | $3,4 \cdot 10^{-7}$   |
| <b>Zn</b> | $< 7,6 \cdot 10^{-5}$ | $2,3 \cdot 10^{-4}$   | <b>Lu</b> | $< 3,7 \cdot 10^{-8}$ | $4,2 \cdot 10^{-6}$   |
| <b>Ga</b> | $< 9,1 \cdot 10^{-7}$ | $7,2 \cdot 10^{-7}$   | <b>Hf</b> | $< 1,1 \cdot 10^{-6}$ | $< 1,1 \cdot 10^{-7}$ |
| <b>Ge</b> | $< 7,1 \cdot 10^{-7}$ | $< 8,1 \cdot 10^{-7}$ | <b>Ta</b> | $< 1,4 \cdot 10^{-7}$ | $3,1 \cdot 10^{-7}$   |
| <b>As</b> | $1,3 \cdot 10^{-5}$   | $< 8,3 \cdot 10^{-6}$ | <b>W</b>  | $1,3 \cdot 10^{-2}$   | $8,7 \cdot 10^{-3}$   |
| <b>Se</b> | $< 5,1 \cdot 10^{-5}$ | $< 3,7 \cdot 10^{-5}$ | <b>Re</b> | $2,4 \cdot 10^{-6}$   | $2,0 \cdot 10^{-5}$   |
| <b>Rb</b> | $2,1 \cdot 10^{-5}$   | $4,7 \cdot 10^{-4}$   | <b>Os</b> | $< 1,6 \cdot 10^{-8}$ | $4,2 \cdot 10^{-7}$   |
| <b>Sr</b> | $5,3 \cdot 10^{-5}$   | $5,3 \cdot 10^{-5}$   | <b>Ir</b> | $< 4,8 \cdot 10^{-8}$ | $2,2 \cdot 10^{-7}$   |
| <b>Y</b>  | $< 8,2 \cdot 10^{-7}$ | $2,1 \cdot 10^{-6}$   | <b>Pt</b> | $< 1,0 \cdot 10^{-6}$ | $1,5 \cdot 10^{-6}$   |
| <b>Zr</b> | $5,1 \cdot 10^{-6}$   | $7,2 \cdot 10^{-6}$   | <b>Au</b> | $2,1 \cdot 10^{-7}$   | $1,0 \cdot 10^{-5}$   |

| Elements  | Batch 1               | Batch 2               | Elements  | Batch 1               | Batch 2               |
|-----------|-----------------------|-----------------------|-----------|-----------------------|-----------------------|
|           | wt. %                 | wt. %                 |           | wt. %                 | wt. %                 |
| <b>Nb</b> | $1,7 \cdot 10^{-4}$   | $1,9 \cdot 10^{-4}$   | <b>Hg</b> | $< 1,3 \cdot 10^{-5}$ | $< 1,6 \cdot 10^{-6}$ |
| <b>Ru</b> | $< 6,4 \cdot 10^{-8}$ | $4,0 \cdot 10^{-6}$   | <b>Tl</b> | $1,9 \cdot 10^{-5}$   | $3,0 \cdot 10^{-5}$   |
| <b>Rh</b> | $< 5,2 \cdot 10^{-8}$ | $< 1,4 \cdot 10^{-7}$ | <b>Pb</b> | $2,0 \cdot 10^{-6}$   | $9,4 \cdot 10^{-5}$   |
| <b>Pd</b> | $< 2,7 \cdot 10^{-8}$ | $< 1,1 \cdot 10^{-7}$ | <b>Bi</b> | $7,8 \cdot 10^{-6}$   | $3,8 \cdot 10^{-6}$   |
| <b>Ag</b> | $1,4 \cdot 10^{-4}$   | $2,6 \cdot 10^{-4}$   | <b>Th</b> | $< 5,2 \cdot 10^{-8}$ | $< 1,7 \cdot 10^{-6}$ |
| <b>In</b> | $< 7,9 \cdot 10^{-7}$ | $< 2,3 \cdot 10^{-7}$ | <b>U</b>  | $5,1 \cdot 10^{-8}$   | $7,2 \cdot 10^{-7}$   |
| <b>Sn</b> | $1,3 \cdot 10^{-5}$   | $4,7 \cdot 10^{-6}$   |           |                       |                       |

Table S3– Impurity content in commercial MoO<sub>3</sub> preparations from different manufactures determined by ICP-MS: Merck KGaA, LANHIT Ltd.

| Elements  | Merck KGaA            | LANHIT Ltd.           | Elements  | Merck KGaA            | LANHIT Ltd.           |
|-----------|-----------------------|-----------------------|-----------|-----------------------|-----------------------|
|           | wt.%                  | wt.%                  |           | wt.%                  | wt.%                  |
| <b>Li</b> | $< 3,5 \cdot 10^{-6}$ | $< 3,4 \cdot 10^{-6}$ | <b>Sb</b> | $3,3 \cdot 10^{-4}$   | $2,2 \cdot 10^{-5}$   |
| <b>Be</b> | $< 2,1 \cdot 10^{-7}$ | $< 1,9 \cdot 10^{-6}$ | <b>Te</b> | $4,6 \cdot 10^{-3}$   | $2,6 \cdot 10^{-4}$   |
| <b>B</b>  | $4,0 \cdot 10^{-2}$   | $< 5,9 \cdot 10^{-6}$ | <b>Cs</b> | $1,7 \cdot 10^{-5}$   | $7,1 \cdot 10^{-5}$   |
| <b>Na</b> | $6,0 \cdot 10^{-4}$   | $9,8 \cdot 10^{-3}$   | <b>Ba</b> | $< 8,7 \cdot 10^{-6}$ | $5,3 \cdot 10^{-5}$   |
| <b>Mg</b> | $< 1,0 \cdot 10^{-5}$ | $7,8 \cdot 10^{-5}$   | <b>La</b> | $< 9,9 \cdot 10^{-8}$ | $4,5 \cdot 10^{-7}$   |
| <b>Al</b> | $< 2,2 \cdot 10^{-5}$ | $1,6 \cdot 10^{-5}$   | <b>Ce</b> | $< 6,5 \cdot 10^{-8}$ | $< 3,7 \cdot 10^{-7}$ |
| <b>Si</b> | $< 2,1 \cdot 10^{-4}$ | $< 3,9 \cdot 10^{-4}$ | <b>Pr</b> | $2,8 \cdot 10^{-6}$   | $8,2 \cdot 10^{-7}$   |
| <b>K</b>  | $< 2,0 \cdot 10^{-5}$ | $8,9 \cdot 10^{-3}$   | <b>Nd</b> | $9,3 \cdot 10^{-6}$   | $< 6,3 \cdot 10^{-7}$ |
| <b>Ca</b> | $< 2,5 \cdot 10^{-5}$ | $1,6 \cdot 10^{-4}$   | <b>Sm</b> | $< 1,1 \cdot 10^{-7}$ | $< 1,9 \cdot 10^{-8}$ |
| <b>Sc</b> | $< 9,5 \cdot 10^{-7}$ | $< 1,0 \cdot 10^{-6}$ | <b>Eu</b> | $< 1,0 \cdot 10^{-7}$ | $< 1,1 \cdot 10^{-7}$ |
| <b>V</b>  | $1,9 \cdot 10^{-4}$   | $< 6,7 \cdot 10^{-6}$ | <b>Gd</b> | $< 1,0 \cdot 10^{-7}$ | $1,1 \cdot 10^{-6}$   |
| <b>Cr</b> | $5,2 \cdot 10^{-5}$   | $5,4 \cdot 10^{-4}$   | <b>Tb</b> | $< 1,5 \cdot 10^{-6}$ | $7,7 \cdot 10^{-8}$   |
| <b>Mn</b> | $9,5 \cdot 10^{-6}$   | $2,1 \cdot 10^{-5}$   | <b>Dy</b> | $< 2,1 \cdot 10^{-8}$ | $9,6 \cdot 10^{-8}$   |
| <b>Fe</b> | $< 6,0 \cdot 10^{-6}$ | $1,7 \cdot 10^{-3}$   | <b>Ho</b> | $< 1,7 \cdot 10^{-8}$ | $1,0 \cdot 10^{-7}$   |
| <b>Co</b> | $5,8 \cdot 10^{-7}$   | $3,3 \cdot 10^{-5}$   | <b>Er</b> | $< 2,1 \cdot 10^{-8}$ | $< 1,9 \cdot 10^{-8}$ |
| <b>Ni</b> | $< 7,4 \cdot 10^{-7}$ | $< 2,0 \cdot 10^{-6}$ | <b>Tm</b> | $< 1,4 \cdot 10^{-8}$ | $4,8 \cdot 10^{-8}$   |
| <b>Cu</b> | $1,7 \cdot 10^{-5}$   | $6,4 \cdot 10^{-5}$   | <b>Yb</b> | $< 2,1 \cdot 10^{-8}$ | $< 1,9 \cdot 10^{-8}$ |
| <b>Zn</b> | $< 3,7 \cdot 10^{-6}$ | $1,6 \cdot 10^{-5}$   | <b>Lu</b> | $4,5 \cdot 10^{-7}$   | $< 3,8 \cdot 10^{-7}$ |
| <b>Ga</b> | $< 5,9 \cdot 10^{-7}$ | $< 7,9 \cdot 10^{-7}$ | <b>Hf</b> | $< 4,0 \cdot 10^{-7}$ | $< 3,1 \cdot 10^{-7}$ |
| <b>Ge</b> | $< 1,1 \cdot 10^{-6}$ | $< 6,7 \cdot 10^{-7}$ | <b>Ta</b> | $< 2,8 \cdot 10^{-6}$ | $7,7 \cdot 10^{-8}$   |
| <b>As</b> | $< 2,0 \cdot 10^{-5}$ | $< 2,0 \cdot 10^{-5}$ | <b>W</b>  | $1,4 \cdot 10^{-2}$   | $4,7 \cdot 10^{-3}$   |
| <b>Se</b> | $< 7,9 \cdot 10^{-6}$ | $< 2,4 \cdot 10^{-5}$ | <b>Re</b> | $2,7 \cdot 10^{-6}$   | $1,7 \cdot 10^{-5}$   |
| <b>Rb</b> | $6,6 \cdot 10^{-5}$   | $5,1 \cdot 10^{-4}$   | <b>Os</b> | $< 2,1 \cdot 10^{-8}$ | $< 1,9 \cdot 10^{-8}$ |
| <b>Sr</b> | $1,4 \cdot 10^{-5}$   | $< 3,4 \cdot 10^{-6}$ | <b>Ir</b> | $< 6,3 \cdot 10^{-8}$ | $< 5,9 \cdot 10^{-8}$ |
| <b>Y</b>  | $< 2,4 \cdot 10^{-7}$ | $< 4,0 \cdot 10^{-7}$ | <b>Pt</b> | $< 1,5 \cdot 10^{-6}$ | $3,5 \cdot 10^{-6}$   |
| <b>Zr</b> | $< 1,3 \cdot 10^{-5}$ | $5,5 \cdot 10^{-7}$   | <b>Au</b> | $< 2,1 \cdot 10^{-8}$ | $< 2,0 \cdot 10^{-7}$ |
| <b>Nb</b> | $3,6 \cdot 10^{-4}$   | $2,2 \cdot 10^{-4}$   | <b>Hg</b> | $2,7 \cdot 10^{-4}$   | $3,7 \cdot 10^{-5}$   |

| Elements  | Merck KGaA            | LANHIT Ltd.           | Elements  | Merck KGaA            | LANHIT Ltd.         |
|-----------|-----------------------|-----------------------|-----------|-----------------------|---------------------|
|           | wt. %                 | wt. %                 |           | wt. %                 | wt. %               |
| <b>Ru</b> | $< 3,9 \cdot 10^{-7}$ | $< 5,9 \cdot 10^{-7}$ | <b>Tl</b> | $1,2 \cdot 10^{-5}$   | $1,3 \cdot 10^{-6}$ |
| <b>Rh</b> | $< 6,7 \cdot 10^{-7}$ | $< 1,2 \cdot 10^{-7}$ | <b>Pb</b> | $< 1,9 \cdot 10^{-6}$ | $2,2 \cdot 10^{-6}$ |
| <b>Pd</b> | $< 5,7 \cdot 10^{-8}$ | $< 3,2 \cdot 10^{-7}$ | <b>Bi</b> | $4,4 \cdot 10^{-6}$   | $5,3 \cdot 10^{-5}$ |
| <b>Ag</b> | $3,5 \cdot 10^{-7}$   | $< 6,5 \cdot 10^{-7}$ | <b>Th</b> | $< 2,1 \cdot 10^{-8}$ | $3,8 \cdot 10^{-8}$ |
| <b>In</b> | $< 7,2 \cdot 10^{-8}$ | $< 6,3 \cdot 10^{-7}$ | <b>U</b>  | $< 4,8 \cdot 10^{-8}$ | $1,5 \cdot 10^{-6}$ |
| <b>Sn</b> | $< 1,5 \cdot 10^{-6}$ | $1,3 \cdot 10^{-4}$   |           |                       |                     |

Table S4 – Impurity content in commercial MoO<sub>3</sub> preparations from SybMetallTorg Ltd. determined by ICP-MS.

| Elements  | Batch 1               | Batch 2               | Elements  | Batch 1               | Batch 2               |
|-----------|-----------------------|-----------------------|-----------|-----------------------|-----------------------|
|           | wt. %                 | wt. %                 |           | wt. %                 | wt. %                 |
| <b>Li</b> | $< 1,7 \cdot 10^{-5}$ | $< 1,8 \cdot 10^{-5}$ | <b>Sb</b> | $6,0 \cdot 10^{-4}$   | $7,9 \cdot 10^{-4}$   |
| <b>Be</b> | $< 1,2 \cdot 10^{-6}$ | $< 1,3 \cdot 10^{-6}$ | <b>Te</b> | $< 1,2 \cdot 10^{-5}$ | $< 1,3 \cdot 10^{-5}$ |
| <b>B</b>  | $< 8,1 \cdot 10^{-6}$ | $< 8,5 \cdot 10^{-6}$ | <b>Cs</b> | $3,4 \cdot 10^{-3}$   | $5,3 \cdot 10^{-4}$   |
| <b>Na</b> | 2,7                   | $2,2 \cdot 10^{-1}$   | <b>Ba</b> | $4,0 \cdot 10^{-4}$   | $1,9 \cdot 10^{-4}$   |
| <b>Mg</b> | $1,9 \cdot 10^{-3}$   | $3,2 \cdot 10^{-3}$   | <b>La</b> | $4,6 \cdot 10^{-7}$   | $1,8 \cdot 10^{-6}$   |
| <b>Al</b> | $5,1 \cdot 10^{-4}$   | $3,5 \cdot 10^{-4}$   | <b>Ce</b> | $3,4 \cdot 10^{-6}$   | $3,7 \cdot 10^{-6}$   |
| <b>Si</b> | $4,0 \cdot 10^{-4}$   | $1,7 \cdot 10^{-4}$   | <b>Pr</b> | $1,3 \cdot 10^{-6}$   | $< 1,3 \cdot 10^{-6}$ |
| <b>K</b>  | $1,5 \cdot 10^{-1}$   | $2,8 \cdot 10^{-2}$   | <b>Nd</b> | $< 1,6 \cdot 10^{-6}$ | $< 1,7 \cdot 10^{-6}$ |
| <b>Ca</b> | $1,0 \cdot 10^{-1}$   | $2,8 \cdot 10^{-1}$   | <b>Sm</b> | $< 3,2 \cdot 10^{-7}$ | $< 3,3 \cdot 10^{-7}$ |
| <b>Sc</b> | $< 7,1 \cdot 10^{-7}$ | $2,2 \cdot 10^{-6}$   | <b>Eu</b> | $< 1,7 \cdot 10^{-6}$ | $< 1,8 \cdot 10^{-6}$ |
| <b>V</b>  | $< 6,2 \cdot 10^{-6}$ | $< 6,6 \cdot 10^{-6}$ | <b>Gd</b> | $< 8,6 \cdot 10^{-8}$ | $< 9,1 \cdot 10^{-8}$ |
| <b>Cr</b> | $1,9 \cdot 10^{-3}$   | $1,2 \cdot 10^{-3}$   | <b>Tb</b> | $< 7,1 \cdot 10^{-8}$ | $< 7,5 \cdot 10^{-8}$ |
| <b>Mn</b> | $1,3 \cdot 10^{-4}$   | $8,5 \cdot 10^{-5}$   | <b>Dy</b> | $< 3,7 \cdot 10^{-6}$ | $< 3,9 \cdot 10^{-6}$ |
| <b>Fe</b> | $9,9 \cdot 10^{-3}$   | $1,6 \cdot 10^{-2}$   | <b>Ho</b> | $< 4,0 \cdot 10^{-6}$ | $< 4,3 \cdot 10^{-6}$ |
| <b>Co</b> | $1,1 \cdot 10^{-3}$   | $2,3 \cdot 10^{-3}$   | <b>Er</b> | $< 3,0 \cdot 10^{-6}$ | $< 3,2 \cdot 10^{-6}$ |
| <b>Ni</b> | $1,2 \cdot 10^{-3}$   | $6,8 \cdot 10^{-4}$   | <b>Tm</b> | $< 3,0 \cdot 10^{-6}$ | $< 3,2 \cdot 10^{-6}$ |
| <b>Cu</b> | $1,7 \cdot 10^{-3}$   | $4,2 \cdot 10^{-3}$   | <b>Yb</b> | $< 2,3 \cdot 10^{-6}$ | $< 2,4 \cdot 10^{-6}$ |
| <b>Zn</b> | $3,0 \cdot 10^{-4}$   | $8,1 \cdot 10^{-5}$   | <b>Lu</b> | $< 2,1 \cdot 10^{-6}$ | $< 2,2 \cdot 10^{-6}$ |
| <b>Ga</b> | $< 1,4 \cdot 10^{-6}$ | $2,5 \cdot 10^{-6}$   | <b>Hf</b> | $7,0 \cdot 10^{-7}$   | $5,7 \cdot 10^{-6}$   |
| <b>Ge</b> | $< 1,3 \cdot 10^{-6}$ | $< 1,4 \cdot 10^{-6}$ | <b>Ta</b> | $3,3 \cdot 10^{-6}$   | $7,1 \cdot 10^{-6}$   |
| <b>As</b> | $< 9,5 \cdot 10^{-6}$ | $< 1,0 \cdot 10^{-5}$ | <b>W</b>  | $5,2 \cdot 10^{-3}$   | $1,8 \cdot 10^{-2}$   |
| <b>Se</b> | $6,6 \cdot 10^{-4}$   | $1,4 \cdot 10^{-3}$   | <b>Re</b> | $1,3 \cdot 10^{-5}$   | $5,3 \cdot 10^{-6}$   |
| <b>Rb</b> | $1,2 \cdot 10^{-2}$   | $2,0 \cdot 10^{-3}$   | <b>Os</b> | $1,9 \cdot 10^{-7}$   | $2,4 \cdot 10^{-7}$   |
| <b>Sr</b> | $4,9 \cdot 10^{-3}$   | $9,6 \cdot 10^{-3}$   | <b>Ir</b> | $9,0 \cdot 10^{-8}$   | $9,5 \cdot 10^{-8}$   |
| <b>Y</b>  | $< 7,1 \cdot 10^{-7}$ | $< 7,6 \cdot 10^{-7}$ | <b>Pt</b> | $2,7 \cdot 10^{-5}$   | $1,1 \cdot 10^{-5}$   |
| <b>Zr</b> | $9,8 \cdot 10^{-5}$   | $2,4 \cdot 10^{-4}$   | <b>Au</b> | $1,2 \cdot 10^{-5}$   | $3,6 \cdot 10^{-6}$   |
| <b>Nb</b> | $1,6 \cdot 10^{-4}$   | $1,5 \cdot 10^{-4}$   | <b>Hg</b> | $< 3,3 \cdot 10^{-5}$ | $< 3,5 \cdot 10^{-5}$ |



| Elements  | Batch 1               | Batch 2               | Elements  | Batch 1               | Batch 2             |
|-----------|-----------------------|-----------------------|-----------|-----------------------|---------------------|
|           | wt. %                 | wt. %                 |           | wt. %                 | wt. %               |
| <b>Ru</b> | $1,1 \cdot 10^{-5}$   | $1,7 \cdot 10^{-6}$   | <b>Tl</b> | $2,4 \cdot 10^{-4}$   | $6,1 \cdot 10^{-5}$ |
| <b>Rh</b> | $< 8,1 \cdot 10^{-8}$ | $< 8,6 \cdot 10^{-8}$ | <b>Pb</b> | $1,3 \cdot 10^{-2}$   | $1,7 \cdot 10^{-1}$ |
| <b>Pd</b> | $3,6 \cdot 10^{-4}$   | $< 2,6 \cdot 10^{-7}$ | <b>Bi</b> | $1,1 \cdot 10^{-3}$   | $5,5 \cdot 10^{-3}$ |
| <b>Ag</b> | $2,2 \cdot 10^{-4}$   | $2,8 \cdot 10^{-4}$   | <b>Th</b> | $< 5,4 \cdot 10^{-7}$ | $9,0 \cdot 10^{-7}$ |
| <b>In</b> | $4,1 \cdot 10^{-6}$   | $4,4 \cdot 10^{-6}$   | <b>U</b>  | $5,2 \cdot 10^{-4}$   | $1,3 \cdot 10^{-3}$ |
| <b>Sn</b> | $7,2 \cdot 10^{-4}$   | $1,8 \cdot 10^{-3}$   |           |                       |                     |

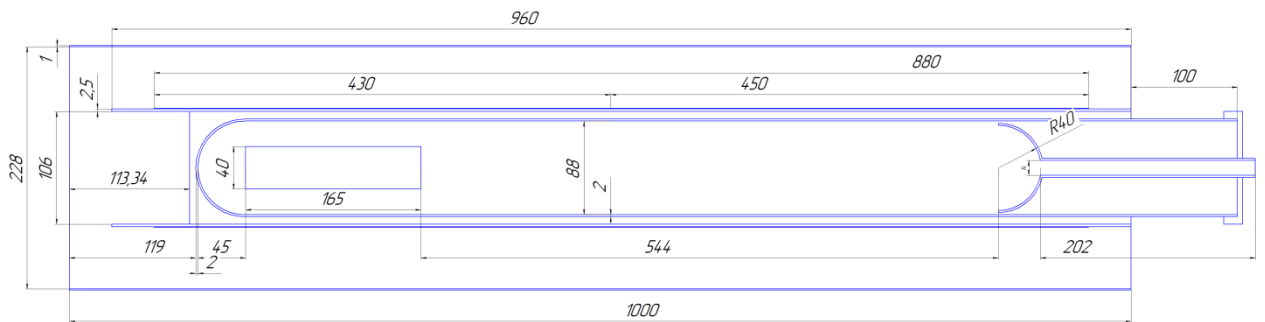

Fig. S1 – Drawing of the sublimation reactor.

Table S5 – Impurities in MoO<sub>3</sub> preparations: initial; after a single purification; after double purification according to the results of ICP-MS analysis.

| Elements  | Initial               | After a single cleaning | After double cleaning | Elements  | Initial               | After a single cleaning | After double cleaning |
|-----------|-----------------------|-------------------------|-----------------------|-----------|-----------------------|-------------------------|-----------------------|
|           | wt%                   | wt%                     | wt%                   |           | wt%                   | wt%                     | wt%                   |
| <b>Li</b> | $< 1,5 \cdot 10^{-5}$ | $< 2,6 \cdot 10^{-5}$   | $< 2,2 \cdot 10^{-5}$ | <b>Sb</b> | $1,8 \cdot 10^{-4}$   | $3,1 \cdot 10^{-5}$     | $6,9 \cdot 10^{-6}$   |
| <b>Be</b> | $< 1,4 \cdot 10^{-6}$ | $< 2,3 \cdot 10^{-6}$   | $< 2,3 \cdot 10^{-6}$ | <b>Te</b> | $3,0 \cdot 10^{-5}$   | $5,6 \cdot 10^{-5}$     | $5,2 \cdot 10^{-5}$   |
| <b>B</b>  | $< 5,1 \cdot 10^{-5}$ | $< 4,5 \cdot 10^{-6}$   | $< 4,5 \cdot 10^{-6}$ | <b>Cs</b> | $3,2 \cdot 10^{-5}$   | $2,6 \cdot 10^{-6}$     | $3,3 \cdot 10^{-6}$   |
| <b>Na</b> | $6,1 \cdot 10^{-4}$   | $< 2,9 \cdot 10^{-5}$   | $< 2,9 \cdot 10^{-5}$ | <b>Ba</b> | $3,4 \cdot 10^{-4}$   | $3,4 \cdot 10^{-5}$     | $1,3 \cdot 10^{-5}$   |
| <b>Mg</b> | $< 1,5 \cdot 10^{-5}$ | $< 2,8 \cdot 10^{-5}$   | $< 2,8 \cdot 10^{-5}$ | <b>La</b> | $< 3,5 \cdot 10^{-7}$ | $1,1 \cdot 10^{-6}$     | $9,1 \cdot 10^{-7}$   |
| <b>Al</b> | $< 1,7 \cdot 10^{-5}$ | $< 1,6 \cdot 10^{-5}$   | $< 1,6 \cdot 10^{-5}$ | <b>Ce</b> | $< 2,4 \cdot 10^{-7}$ | $< 9,3 \cdot 10^{-7}$   | $< 8,1 \cdot 10^{-7}$ |
| <b>Si</b> | $< 2,7 \cdot 10^{-4}$ | $< 2,0 \cdot 10^{-4}$   | $< 2,0 \cdot 10^{-4}$ | <b>Pr</b> | $5,3 \cdot 10^{-7}$   | $< 6,9 \cdot 10^{-7}$   | $< 7,2 \cdot 10^{-7}$ |
| <b>K</b>  | $1,5 \cdot 10^{-3}$   | $< 3,8 \cdot 10^{-5}$   | $< 3,8 \cdot 10^{-5}$ | <b>Nd</b> | $< 3,4 \cdot 10^{-7}$ | $< 6,3 \cdot 10^{-7}$   | $< 6,4 \cdot 10^{-7}$ |
| <b>Ca</b> | $8,3 \cdot 10^{-4}$   | $< 1,9 \cdot 10^{-5}$   | $< 1,9 \cdot 10^{-5}$ | <b>Sm</b> | $< 1,6 \cdot 10^{-8}$ | $< 1,9 \cdot 10^{-7}$   | $< 1,9 \cdot 10^{-7}$ |
| <b>Sc</b> | $< 1,5 \cdot 10^{-7}$ | $< 1,9 \cdot 10^{-7}$   | $< 8,6 \cdot 10^{-7}$ | <b>Eu</b> | $< 1,5 \cdot 10^{-7}$ | $< 1,3 \cdot 10^{-7}$   | $< 1,3 \cdot 10^{-7}$ |
| <b>V</b>  | $1,6 \cdot 10^{-4}$   | $4,1 \cdot 10^{-5}$     | $1,4 \cdot 10^{-5}$   | <b>Gd</b> | $< 2,5 \cdot 10^{-7}$ | $< 6,4 \cdot 10^{-7}$   | $< 6,5 \cdot 10^{-7}$ |
| <b>Cr</b> | $7,7 \cdot 10^{-5}$   | $1,5 \cdot 10^{-5}$     | $1,6 \cdot 10^{-5}$   | <b>Tb</b> | $< 1,6 \cdot 10^{-7}$ | $< 9,5 \cdot 10^{-7}$   | $< 9,5 \cdot 10^{-7}$ |
| <b>Mn</b> | $< 8,8 \cdot 10^{-7}$ | $9,1 \cdot 10^{-7}$     | $6,2 \cdot 10^{-6}$   | <b>Dy</b> | $< 1,6 \cdot 10^{-8}$ | $< 3,7 \cdot 10^{-7}$   | $< 3,7 \cdot 10^{-7}$ |
| <b>Fe</b> | $< 9,8 \cdot 10^{-6}$ | $< 9,2 \cdot 10^{-6}$   | $< 9,3 \cdot 10^{-6}$ | <b>Ho</b> | $< 1,2 \cdot 10^{-7}$ | $5,0 \cdot 10^{-8}$     | $4,1 \cdot 10^{-8}$   |
| <b>Co</b> | $3,0 \cdot 10^{-7}$   | $1,4 \cdot 10^{-6}$     | $5,5 \cdot 10^{-7}$   | <b>Er</b> | $< 8,0 \cdot 10^{-8}$ | $< 3,4 \cdot 10^{-7}$   | $< 3,4 \cdot 10^{-7}$ |
| <b>Ni</b> | $1,9 \cdot 10^{-6}$   | $7,5 \cdot 10^{-7}$     | $2,2 \cdot 10^{-6}$   | <b>Tm</b> | $< 5,8 \cdot 10^{-8}$ | $< 6,1 \cdot 10^{-7}$   | $< 6,2 \cdot 10^{-7}$ |
| <b>Cu</b> | $1,7 \cdot 10^{-4}$   | $8,4 \cdot 10^{-5}$     | $9,1 \cdot 10^{-5}$   | <b>Yb</b> | $< 2,4 \cdot 10^{-7}$ | $< 3,1 \cdot 10^{-7}$   | $< 3,1 \cdot 10^{-7}$ |
| <b>Zn</b> | $< 7,6 \cdot 10^{-5}$ | $< 9,8 \cdot 10^{-6}$   | $9,9 \cdot 10^{-7}$   | <b>Lu</b> | $< 3,7 \cdot 10^{-8}$ | $< 7,8 \cdot 10^{-7}$   | $< 7,8 \cdot 10^{-7}$ |
| <b>Ga</b> | $< 9,1 \cdot 10^{-7}$ | $< 2,6 \cdot 10^{-6}$   | $< 2,6 \cdot 10^{-6}$ | <b>Hf</b> | $< 1,1 \cdot 10^{-6}$ | $1,2 \cdot 10^{-7}$     | $< 7,7 \cdot 10^{-8}$ |
| <b>Ge</b> | $< 7,1 \cdot 10^{-7}$ | $< 1,6 \cdot 10^{-7}$   | $< 3,1 \cdot 10^{-7}$ | <b>Ta</b> | $< 1,4 \cdot 10^{-7}$ | $< 2,6 \cdot 10^{-7}$   | $< 2,6 \cdot 10^{-7}$ |
| <b>As</b> | $1,3 \cdot 10^{-5}$   | $3,2 \cdot 10^{-5}$     | $5,2 \cdot 10^{-5}$   | <b>W</b>  | $1,3 \cdot 10^{-2}$   | $1,5 \cdot 10^{-2}$     | $1,4 \cdot 10^{-2}$   |
| <b>Se</b> | $< 5,1 \cdot 10^{-5}$ | $< 1,3 \cdot 10^{-5}$   | $< 1,3 \cdot 10^{-5}$ | <b>Re</b> | $2,4 \cdot 10^{-6}$   | $2,3 \cdot 10^{-7}$     | $2,6 \cdot 10^{-7}$   |
| <b>Rb</b> | $2,1 \cdot 10^{-5}$   | $4,8 \cdot 10^{-7}$     | $< 4,1 \cdot 10^{-6}$ | <b>Os</b> | $< 1,6 \cdot 10^{-8}$ | $9,8 \cdot 10^{-8}$     | $7,5 \cdot 10^{-8}$   |
| <b>Sr</b> | $5,3 \cdot 10^{-5}$   | $< 4,8 \cdot 10^{-6}$   | $< 3,4 \cdot 10^{-6}$ | <b>Ir</b> | $< 4,8 \cdot 10^{-8}$ | $1,0 \cdot 10^{-7}$     | $1,7 \cdot 10^{-7}$   |

| Elements  | Initial               | After a single cleaning | After double cleaning | Elements  | Initial               | After a single cleaning | After double cleaning |
|-----------|-----------------------|-------------------------|-----------------------|-----------|-----------------------|-------------------------|-----------------------|
|           | wt%                   | wt%                     | wt%                   |           | wt%                   | wt%                     | wt%                   |
| <b>Y</b>  | $< 8,2 \cdot 10^{-7}$ | $< 4,3 \cdot 10^{-7}$   | $< 4,3 \cdot 10^{-7}$ | <b>Pt</b> | $< 1,0 \cdot 10^{-6}$ | $< 5,5 \cdot 10^{-6}$   | $< 5,9 \cdot 10^{-6}$ |
| <b>Zr</b> | $5,1 \cdot 10^{-6}$   | $4,0 \cdot 10^{-6}$     | $4,7 \cdot 10^{-6}$   | <b>Au</b> | $2,1 \cdot 10^{-7}$   | $2,5 \cdot 10^{-7}$     | $2,5 \cdot 10^{-7}$   |
| <b>Nb</b> | $1,7 \cdot 10^{-4}$   | $1,9 \cdot 10^{-5}$     | $1,6 \cdot 10^{-5}$   | <b>Hg</b> | $< 1,3 \cdot 10^{-5}$ | $< 3,2 \cdot 10^{-5}$   | $< 4,9 \cdot 10^{-5}$ |
| <b>Ru</b> | $< 6,4 \cdot 10^{-8}$ | $< 2,2 \cdot 10^{-7}$   | $< 2,2 \cdot 10^{-7}$ | <b>Tl</b> | $1,9 \cdot 10^{-5}$   | $8,1 \cdot 10^{-7}$     | $2,9 \cdot 10^{-7}$   |
| <b>Rh</b> | $< 5,2 \cdot 10^{-8}$ | $1,1 \cdot 10^{-8}$     | $3,3 \cdot 10^{-8}$   | <b>Pb</b> | $2,0 \cdot 10^{-6}$   | $4,9 \cdot 10^{-5}$     | $2,6 \cdot 10^{-5}$   |
| <b>Pd</b> | $< 2,7 \cdot 10^{-8}$ | $< 3,2 \cdot 10^{-8}$   | $< 3,2 \cdot 10^{-8}$ | <b>Bi</b> | $7,8 \cdot 10^{-6}$   | $3,1 \cdot 10^{-6}$     | $2,8 \cdot 10^{-6}$   |
| <b>Ag</b> | $1,4 \cdot 10^{-4}$   | $< 7,1 \cdot 10^{-7}$   | $< 7,1 \cdot 10^{-7}$ | <b>Th</b> | $< 5,2 \cdot 10^{-8}$ | $< 3,6 \cdot 10^{-7}$   | $< 3,6 \cdot 10^{-7}$ |
| <b>In</b> | $< 7,9 \cdot 10^{-7}$ | $< 2,5 \cdot 10^{-5}$   | $< 2,5 \cdot 10^{-5}$ | <b>U</b>  | $5,1 \cdot 10^{-8}$   | $2,8 \cdot 10^{-8}$     | $6,1 \cdot 10^{-8}$   |
| <b>Sn</b> | $1,3 \cdot 10^{-5}$   | $1,1 \cdot 10^{-5}$     | $3,9 \cdot 10^{-6}$   |           |                       |                         |                       |

Table S6 – Impurity of MoO<sub>3</sub> preparations obtained by adding of CuO; ZnO; Cr<sub>2</sub>O<sub>3</sub> analyzed by ICP-MS.

| Elements  | CuO                   | ZnO                   | Cr <sub>2</sub> O <sub>3</sub> | Elements  | CuO                   | ZnO                   | Cr <sub>2</sub> O <sub>3</sub> |
|-----------|-----------------------|-----------------------|--------------------------------|-----------|-----------------------|-----------------------|--------------------------------|
|           | wt%                   | wt%                   | wt%                            |           | wt%                   | wt%                   | wt%                            |
| <b>Li</b> | $1,5 \cdot 10^{-5}$   | $5,5 \cdot 10^{-5}$   | $1,2 \cdot 10^{-5}$            | <b>Sb</b> | $< 1,2 \cdot 10^{-6}$ | $1,2 \cdot 10^{-4}$   | $1,0 \cdot 10^{-4}$            |
| <b>Be</b> | $< 2,2 \cdot 10^{-6}$ | $< 2,3 \cdot 10^{-6}$ | $< 2,2 \cdot 10^{-6}$          | <b>Te</b> | $< 1,7 \cdot 10^{-5}$ | $< 2,8 \cdot 10^{-5}$ | $< 1,8 \cdot 10^{-5}$          |
| <b>B</b>  | $< 4,3 \cdot 10^{-6}$ | $5,9 \cdot 10^{-6}$   | $< 4,4 \cdot 10^{-6}$          | <b>Cs</b> | $1,8 \cdot 10^{-6}$   | $4,0 \cdot 10^{-6}$   | $4,2 \cdot 10^{-6}$            |
| <b>Na</b> | $< 8,0 \cdot 10^{-6}$ | $< 8,2 \cdot 10^{-6}$ | $< 7,2 \cdot 10^{-6}$          | <b>Ba</b> | $1,4 \cdot 10^{-5}$   | $1,8 \cdot 10^{-5}$   | $< 5,3 \cdot 10^{-6}$          |
| <b>Mg</b> | $< 2,7 \cdot 10^{-5}$ | $< 2,8 \cdot 10^{-5}$ | $< 2,7 \cdot 10^{-5}$          | <b>La</b> | $6,3 \cdot 10^{-8}$   | $1,9 \cdot 10^{-7}$   | $9,0 \cdot 10^{-8}$            |
| <b>Al</b> | $< 1,5 \cdot 10^{-5}$ | $9,6 \cdot 10^{-5}$   | $< 1,0 \cdot 10^{-5}$          | <b>Ce</b> | $< 1,2 \cdot 10^{-6}$ | $< 9,6 \cdot 10^{-7}$ | $1,4 \cdot 10^{-6}$            |
| <b>Si</b> | $< 1,9 \cdot 10^{-4}$ | $1,5 \cdot 10^{-3}$   | $2,9 \cdot 10^{-4}$            | <b>Pr</b> | $5,7 \cdot 10^{-7}$   | $4,3 \cdot 10^{-7}$   | $5,7 \cdot 10^{-7}$            |
| <b>K</b>  | $< 3,6 \cdot 10^{-5}$ | $3,8 \cdot 10^{-5}$   | $< 3,7 \cdot 10^{-5}$          | <b>Nd</b> | $4,9 \cdot 10^{-7}$   | $1,1 \cdot 10^{-6}$   | $4,5 \cdot 10^{-6}$            |
| <b>Ca</b> | $1,2 \cdot 10^{-5}$   | $< 3,0 \cdot 10^{-5}$ | $< 1,8 \cdot 10^{-5}$          | <b>Sm</b> | $< 1,9 \cdot 10^{-6}$ | $4,7 \cdot 10^{-7}$   | $< 1,9 \cdot 10^{-6}$          |
| <b>Sc</b> | $< 8,2 \cdot 10^{-7}$ | $< 8,6 \cdot 10^{-7}$ | $6,1 \cdot 10^{-7}$            | <b>Eu</b> | $< 7,5 \cdot 10^{-7}$ | $< 2,1 \cdot 10^{-7}$ | $< 6,5 \cdot 10^{-7}$          |
| <b>V</b>  | $< 6,5 \cdot 10^{-6}$ | $2,0 \cdot 10^{-5}$   | $1,0 \cdot 10^{-4}$            | <b>Gd</b> | $< 6,2 \cdot 10^{-7}$ | $< 6,5 \cdot 10^{-7}$ | $< 6,3 \cdot 10^{-7}$          |
| <b>Cr</b> | $< 4,0 \cdot 10^{-5}$ | $< 4,1 \cdot 10^{-5}$ | $< 6,7 \cdot 10^{-5}$          | <b>Tb</b> | $3,9 \cdot 10^{-8}$   | $< 9,5 \cdot 10^{-7}$ | $< 9,2 \cdot 10^{-7}$          |
| <b>Mn</b> | $< 3,1 \cdot 10^{-6}$ | $< 9,7 \cdot 10^{-7}$ | $< 9,4 \cdot 10^{-7}$          | <b>Dy</b> | $< 3,5 \cdot 10^{-7}$ | $< 3,7 \cdot 10^{-7}$ | $< 3,7 \cdot 10^{-7}$          |
| <b>Fe</b> | $< 8,8 \cdot 10^{-6}$ | $< 9,2 \cdot 10^{-6}$ | $< 8,9 \cdot 10^{-6}$          | <b>Ho</b> | $< 4,6 \cdot 10^{-7}$ | $< 5,5 \cdot 10^{-7}$ | $< 4,2 \cdot 10^{-7}$          |
| <b>Co</b> | $< 7,4 \cdot 10^{-7}$ | $< 7,7 \cdot 10^{-7}$ | $4,8 \cdot 10^{-6}$            | <b>Er</b> | $1,2 \cdot 10^{-7}$   | $< 3,4 \cdot 10^{-7}$ | $< 3,3 \cdot 10^{-7}$          |
| <b>Ni</b> | $< 7,4 \cdot 10^{-6}$ | $< 7,1 \cdot 10^{-6}$ | $< 6,0 \cdot 10^{-6}$          | <b>Tm</b> | $3,9 \cdot 10^{-8}$   | $5,2 \cdot 10^{-8}$   | $< 5,9 \cdot 10^{-7}$          |
| <b>Cu</b> | $1,6 \cdot 10^{-4}$   | $< 2,0 \cdot 10^{-6}$ | $< 2,4 \cdot 10^{-6}$          | <b>Yb</b> | $< 3,0 \cdot 10^{-7}$ | $< 3,1 \cdot 10^{-7}$ | $< 3,0 \cdot 10^{-7}$          |
| <b>Zn</b> | $< 9,4 \cdot 10^{-6}$ | $4,8 \cdot 10^{-5}$   | $< 9,5 \cdot 10^{-6}$          | <b>Lu</b> | $< 7,4 \cdot 10^{-7}$ | $< 7,8 \cdot 10^{-7}$ | $< 7,6 \cdot 10^{-7}$          |
| <b>Ga</b> | $3,4 \cdot 10^{-6}$   | $2,1 \cdot 10^{-6}$   | $2,2 \cdot 10^{-6}$            | <b>Hf</b> | $< 7,3 \cdot 10^{-8}$ | $< 3,8 \cdot 10^{-7}$ | $< 8,7 \cdot 10^{-8}$          |
| <b>Ge</b> | $< 1,5 \cdot 10^{-7}$ | $< 1,7 \cdot 10^{-7}$ | $< 1,4 \cdot 10^{-7}$          | <b>Ta</b> | $< 2,5 \cdot 10^{-7}$ | $4,7 \cdot 10^{-8}$   | $< 2,5 \cdot 10^{-7}$          |
| <b>As</b> | $< 1,2 \cdot 10^{-5}$ | $< 1,3 \cdot 10^{-5}$ | $< 1,2 \cdot 10^{-5}$          | <b>W</b>  | $1,4 \cdot 10^{-3}$   | $3,2 \cdot 10^{-3}$   | $5,4 \cdot 10^{-3}$            |
| <b>Se</b> | $< 1,9 \cdot 10^{-5}$ | $< 1,3 \cdot 10^{-5}$ | $2,7 \cdot 10^{-6}$            | <b>Re</b> | $1,1 \cdot 10^{-7}$   | $3,0 \cdot 10^{-7}$   | $2,3 \cdot 10^{-7}$            |
| <b>Rb</b> | $1,2 \cdot 10^{-6}$   | $< 3,3 \cdot 10^{-6}$ | $< 4,5 \cdot 10^{-6}$          | <b>Os</b> | $< 1,3 \cdot 10^{-8}$ | $< 1,1 \cdot 10^{-8}$ | $1,5 \cdot 10^{-7}$            |
| <b>Sr</b> | $< 4,6 \cdot 10^{-6}$ | $< 4,8 \cdot 10^{-6}$ | $< 4,7 \cdot 10^{-6}$          | <b>Ir</b> | $1,9 \cdot 10^{-7}$   | $5,8 \cdot 10^{-9}$   | $< 4,0 \cdot 10^{-8}$          |
| <b>Y</b>  | $< 4,1 \cdot 10^{-7}$ | $7,8 \cdot 10^{-7}$   | $< 4,3 \cdot 10^{-7}$          | <b>Pt</b> | $5,3 \cdot 10^{-7}$   | $3,1 \cdot 10^{-6}$   | $1,7 \cdot 10^{-5}$            |
| <b>Zr</b> | $2,9 \cdot 10^{-6}$   | $4,3 \cdot 10^{-6}$   | $8,6 \cdot 10^{-7}$            | <b>Au</b> | $5,9 \cdot 10^{-7}$   | $1,0 \cdot 10^{-5}$   | $< 1,4 \cdot 10^{-7}$          |
| <b>Nb</b> | $1,5 \cdot 10^{-4}$   | $1,5 \cdot 10^{-4}$   | $1,4 \cdot 10^{-4}$            | <b>Hg</b> | $8,7 \cdot 10^{-6}$   | $1,6 \cdot 10^{-5}$   | $4,1 \cdot 10^{-6}$            |
| <b>Ru</b> | $< 2,1 \cdot 10^{-7}$ | $< 2,2 \cdot 10^{-7}$ | $< 2,1 \cdot 10^{-7}$          | <b>Tl</b> | $< 1,9 \cdot 10^{-7}$ | $5,1 \cdot 10^{-7}$   | $< 6,3 \cdot 10^{-8}$          |
| <b>Rh</b> | $< 1,4 \cdot 10^{-7}$ | $1,0 \cdot 10^{-7}$   | $1,1 \cdot 10^{-7}$            | <b>Pb</b> | $3,6 \cdot 10^{-7}$   | $5,6 \cdot 10^{-5}$   | $2,1 \cdot 10^{-6}$            |
| <b>Pd</b> | $< 3,1 \cdot 10^{-8}$ | $< 3,2 \cdot 10^{-8}$ | $< 3,1 \cdot 10^{-8}$          | <b>Bi</b> | $6,7 \cdot 10^{-6}$   | $1,1 \cdot 10^{-5}$   | $< 6,7 \cdot 10^{-7}$          |
| <b>Ag</b> | $< 6,8 \cdot 10^{-7}$ | $8,5 \cdot 10^{-7}$   | $2,0 \cdot 10^{-7}$            | <b>Th</b> | $2,4 \cdot 10^{-8}$   | $< 3,6 \cdot 10^{-8}$ | $4,2 \cdot 10^{-8}$            |

| <b>Elements</b> | <b>CuO</b>            | <b>ZnO</b>            | <b>Cr<sub>2</sub>O<sub>3</sub></b> | <b>Elements</b> | <b>CuO</b>          | <b>ZnO</b>          | <b>Cr<sub>2</sub>O<sub>3</sub></b> |
|-----------------|-----------------------|-----------------------|------------------------------------|-----------------|---------------------|---------------------|------------------------------------|
|                 | wt%                   | wt%                   | wt%                                |                 | wt%                 | wt%                 | wt%                                |
| <b>In</b>       | $< 2,4 \cdot 10^{-6}$ | $< 2,5 \cdot 10^{-6}$ | $< 2,4 \cdot 10^{-6}$              | <b>U</b>        | $1,8 \cdot 10^{-7}$ | $7,6 \cdot 10^{-8}$ | $9,7 \cdot 10^{-8}$                |
| <b>Sn</b>       | $< 1,6 \cdot 10^{-6}$ | $4,4 \cdot 10^{-5}$   | $< 1,2 \cdot 10^{-6}$              |                 |                     |                     |                                    |

Table S7 – Impurity composition of purified MoO<sub>3</sub> used at LBO single crystal growth according to ICP-MS analysis.

| <b>Elements</b> | <b>Concentration, wt. %</b> |
|-----------------|-----------------------------|-----------------|-----------------------------|-----------------|-----------------------------|-----------------|-----------------------------|
| <b>Li</b>       | $< 1,8 \cdot 10^{-5}$       | <b>Zn</b>       | $< 1,3 \cdot 10^{-5}$       | <b>Te</b>       | $< 1,3 \cdot 10^{-6}$       | <b>Hf</b>       | $< 1,1 \cdot 10^{-7}$       |
| <b>Be</b>       | $< 1,3 \cdot 10^{-6}$       | <b>Ga</b>       | $4,2 \cdot 10^{-6}$         | <b>Cs</b>       | $2,6 \cdot 10^{-6}$         | <b>Ta</b>       | $9,8 \cdot 10^{-8}$         |
| <b>B</b>        | $< 8,7 \cdot 10^{-6}$       | <b>Ge</b>       | $< 1,4 \cdot 10^{-6}$       | <b>Ba</b>       | $2,6 \cdot 10^{-5}$         | <b>W</b>        | $2,0 \cdot 10^{-4}$         |
| <b>Na</b>       | $< 3,2 \cdot 10^{-5}$       | <b>As</b>       | $< 1,0 \cdot 10^{-5}$       | <b>La</b>       | $4,8 \cdot 10^{-6}$         | <b>Re</b>       | $4,5 \cdot 10^{-8}$         |
| <b>Mg</b>       | $< 3,3 \cdot 10^{-5}$       | <b>Se</b>       | $< 2,5 \cdot 10^{-5}$       | <b>Ce</b>       | $2,2 \cdot 10^{-6}$         | <b>Os</b>       | $1,3 \cdot 10^{-7}$         |
| <b>Al</b>       | $6,1 \cdot 10^{-5}$         | <b>Rb</b>       | $< 1,4 \cdot 10^{-6}$       | <b>Pr</b>       | $3,2 \cdot 10^{-6}$         | <b>Ir</b>       | $1,5 \cdot 10^{-7}$         |
| <b>Si</b>       | $< 4,9 \cdot 10^{-5}$       | <b>Sr</b>       | $< 2,7 \cdot 10^{-6}$       | <b>Nd</b>       | $3,3 \cdot 10^{-6}$         | <b>Pt</b>       | $< 3,3 \cdot 10^{-6}$       |
| <b>K</b>        | $< 3,6 \cdot 10^{-5}$       | <b>Y</b>        | $< 7,7 \cdot 10^{-7}$       | <b>Sm</b>       | $< 3,4 \cdot 10^{-7}$       | <b>Au</b>       | $< 7,4 \cdot 10^{-7}$       |
| <b>Ca</b>       | $4,2 \cdot 10^{-5}$         | <b>Zr</b>       | $< 1,0 \cdot 10^{-6}$       | <b>Eu</b>       | $< 1,8 \cdot 10^{-6}$       | <b>Hg</b>       | $< 3,6 \cdot 10^{-5}$       |
| <b>Sc</b>       | $3,0 \cdot 10^{-6}$         | <b>Nb</b>       | $1,9 \cdot 10^{-4}$         | <b>Gd</b>       | $< 9,3 \cdot 10^{-8}$       | <b>Tl</b>       | $< 6,0 \cdot 10^{-7}$       |
| <b>V</b>        | $< 6,7 \cdot 10^{-6}$       | <b>Ru</b>       | $2,5 \cdot 10^{-7}$         | <b>Tb</b>       | $< 7,7 \cdot 10^{-8}$       | <b>Pb</b>       | $5,1 \cdot 10^{-6}$         |
| <b>Cr</b>       | $1,5 \cdot 10^{-6}$         | <b>Rh</b>       | $< 8,7 \cdot 10^{-8}$       | <b>Dy</b>       | $< 3,9 \cdot 10^{-6}$       | <b>Bi</b>       | $< 2,9 \cdot 10^{-6}$       |
| <b>Mn</b>       | $1,9 \cdot 10^{-6}$         | <b>Pd</b>       | $< 2,7 \cdot 10^{-7}$       | <b>Ho</b>       | $< 4,4 \cdot 10^{-6}$       | <b>Th</b>       | $< 5,8 \cdot 10^{-7}$       |
| <b>Fe</b>       | $2,3 \cdot 10^{-5}$         | <b>Ag</b>       | $< 9,4 \cdot 10^{-8}$       | <b>Er</b>       | $< 3,3 \cdot 10^{-6}$       | <b>U</b>        | $< 1,0 \cdot 10^{-8}$       |
| <b>Co</b>       | $< 8,1 \cdot 10^{-7}$       | <b>In</b>       | $4,2 \cdot 10^{-6}$         | <b>Tm</b>       | $< 3,3 \cdot 10^{-6}$       |                 |                             |
| <b>Ni</b>       | $9,7 \cdot 10^{-7}$         | <b>Sn</b>       | $< 3,7 \cdot 10^{-6}$       | <b>Yb</b>       | $< 2,4 \cdot 10^{-6}$       |                 |                             |
| <b>Cu</b>       | $1,1 \cdot 10^{-5}$         | <b>Sb</b>       | $6,6 \cdot 10^{-6}$         | <b>Lu</b>       | $< 2,3 \cdot 10^{-6}$       |                 |                             |

Table S8 – Impurity compositions of the melt and the LBO crystal grown by TSSG method using MoO<sub>3</sub> produced by NPF Nevsky Khimik Ltd. based on the results of ICP-MS analysis.

| Elements  | Melt                  | Crystal               | Elements  | Melt                  | Crystal               |
|-----------|-----------------------|-----------------------|-----------|-----------------------|-----------------------|
|           | wt. %                 | wt. %                 |           | wt. %                 | wt. %                 |
| <b>Be</b> | $5,2 \cdot 10^{-6}$   | $3,3 \cdot 10^{-6}$   | <b>Sn</b> | $2,5 \cdot 10^{-4}$   | $1,4 \cdot 10^{-5}$   |
| <b>Na</b> | $1,5 \cdot 10^{-3}$   | $2,3 \cdot 10^{-4}$   | <b>Sb</b> | $5,3 \cdot 10^{-5}$   | $< 6,8 \cdot 10^{-7}$ |
| <b>Mg</b> | $5,4 \cdot 10^{-4}$   | $4,1 \cdot 10^{-5}$   | <b>Te</b> | $3,6 \cdot 10^{-5}$   | $< 7,6 \cdot 10^{-6}$ |
| <b>Al</b> | $9,9 \cdot 10^{-4}$   | $6,7 \cdot 10^{-5}$   | <b>Cs</b> | $1,0 \cdot 10^{-5}$   | $< 1,8 \cdot 10^{-7}$ |
| <b>Si</b> | $4,6 \cdot 10^{-4}$   | $1,6 \cdot 10^{-3}$   | <b>Ba</b> | $4,8 \cdot 10^{-4}$   | $1,1 \cdot 10^{-5}$   |
| <b>K</b>  | $< 2,0 \cdot 10^{-4}$ | $1,3 \cdot 10^{-4}$   | <b>La</b> | $4,9 \cdot 10^{-6}$   | $5,2 \cdot 10^{-8}$   |
| <b>Ca</b> | $3,8 \cdot 10^{-4}$   | $5,7 \cdot 10^{-5}$   | <b>Ce</b> | $5,6 \cdot 10^{-6}$   | $1,3 \cdot 10^{-6}$   |
| <b>Sc</b> | $7,4 \cdot 10^{-7}$   | $1,4 \cdot 10^{-7}$   | <b>Pr</b> | $5,0 \cdot 10^{-7}$   | $< 8,5 \cdot 10^{-7}$ |
| <b>Ti</b> | -                     | $3,0 \cdot 10^{-4}$   | <b>Nd</b> | $9,3 \cdot 10^{-7}$   | $< 1,7 \cdot 10^{-7}$ |
| <b>V</b>  | $< 7,3 \cdot 10^{-5}$ | $2,0 \cdot 10^{-5}$   | <b>Sm</b> | $2,4 \cdot 10^{-7}$   | $< 1,7 \cdot 10^{-7}$ |
| <b>Cr</b> | $4,0 \cdot 10^{-5}$   | $1,5 \cdot 10^{-5}$   | <b>Eu</b> | $2,6 \cdot 10^{-7}$   | $< 1,7 \cdot 10^{-7}$ |
| <b>Mn</b> | $5,9 \cdot 10^{-5}$   | $< 3,2 \cdot 10^{-6}$ | <b>Gd</b> | $9,9 \cdot 10^{-7}$   | $< 2,1 \cdot 10^{-7}$ |
| <b>Fe</b> | $5,9 \cdot 10^{-4}$   | $1,9 \cdot 10^{-5}$   | <b>Tb</b> | $1,1 \cdot 10^{-6}$   | $< 1,1 \cdot 10^{-7}$ |
| <b>Co</b> | $< 5,0 \cdot 10^{-6}$ | $< 9,4 \cdot 10^{-6}$ | <b>Dy</b> | $1,8 \cdot 10^{-7}$   | $< 1,7 \cdot 10^{-8}$ |
| <b>Ni</b> | $1,1 \cdot 10^{-6}$   | $4,0 \cdot 10^{-5}$   | <b>Ho</b> | $5,9 \cdot 10^{-7}$   | $< 1,1 \cdot 10^{-8}$ |
| <b>Cu</b> | $< 4,5 \cdot 10^{-5}$ | $1,0 \cdot 10^{-6}$   | <b>Er</b> | $< 5,9 \cdot 10^{-7}$ | $< 1,7 \cdot 10^{-8}$ |
| <b>Zn</b> | $< 7,2 \cdot 10^{-5}$ | $1,8 \cdot 10^{-5}$   | <b>Tm</b> | $5,9 \cdot 10^{-7}$   | $< 1,7 \cdot 10^{-8}$ |
| <b>Ga</b> | $1,8 \cdot 10^{-6}$   | $< 4,7 \cdot 10^{-6}$ | <b>Yb</b> | $< 5,9 \cdot 10^{-7}$ | $6,0 \cdot 10^{-8}$   |
| <b>Ge</b> | $< 1,9 \cdot 10^{-6}$ | $< 1,2 \cdot 10^{-6}$ | <b>Lu</b> | $5,9 \cdot 10^{-7}$   | $6,4 \cdot 10^{-8}$   |
| <b>As</b> | $1,3 \cdot 10^{-5}$   | $2,4 \cdot 10^{-6}$   | <b>Hf</b> | $3,1 \cdot 10^{-7}$   | $< 3,3 \cdot 10^{-8}$ |
| <b>Se</b> | $< 2,3 \cdot 10^{-5}$ | $< 6,5 \cdot 10^{-5}$ | <b>Ta</b> | $2,9 \cdot 10^{-8}$   | $< 1,1 \cdot 10^{-7}$ |
| <b>Rb</b> | $3,4 \cdot 10^{-6}$   | $< 4,4 \cdot 10^{-5}$ | <b>W</b>  | $5,4 \cdot 10^{-3}$   | $2,3 \cdot 10^{-5}$   |
| <b>Sr</b> | $9,9 \cdot 10^{-6}$   | $2,9 \cdot 10^{-8}$   | <b>Re</b> | $1,8 \cdot 10^{-7}$   | $< 1,7 \cdot 10^{-7}$ |
| <b>Y</b>  | $1,6 \cdot 10^{-5}$   | $1,4 \cdot 10^{-6}$   | <b>Os</b> | $< 5,9 \cdot 10^{-7}$ | $< 1,7 \cdot 10^{-7}$ |
| <b>Zr</b> | $3,2 \cdot 10^{-5}$   | $< 1,4 \cdot 10^{-6}$ | <b>Ir</b> | $4,1 \cdot 10^{-8}$   | $< 1,7 \cdot 10^{-7}$ |
| <b>Nb</b> | $9,2 \cdot 10^{-5}$   | $5,9 \cdot 10^{-7}$   | <b>Pt</b> | $1,8 \cdot 10^{-2}$   | $4,2 \cdot 10^{-4}$   |

| <b>Elements</b> | <b>Melt</b>           | <b>Crystal</b>        | <b>Elements</b> | <b>Melt</b>         | <b>Crystal</b>        |
|-----------------|-----------------------|-----------------------|-----------------|---------------------|-----------------------|
|                 | wt. %                 | wt. %                 |                 | wt. %               | wt. %                 |
| <b>Mo</b>       | -                     | $< 2,2 \cdot 10^{-5}$ | <b>Au</b>       | $1,6 \cdot 10^{-7}$ | $< 5,6 \cdot 10^{-7}$ |
| <b>Ru</b>       | $2,4 \cdot 10^{-7}$   | $2,8 \cdot 10^{-7}$   | <b>Hg</b>       | $1,3 \cdot 10^{-5}$ | $1,7 \cdot 10^{-5}$   |
| <b>Rh</b>       | $3,0 \cdot 10^{-5}$   | $1,1 \cdot 10^{-7}$   | <b>Tl</b>       | $1,4 \cdot 10^{-6}$ | $2,4 \cdot 10^{-7}$   |
| <b>Pd</b>       | $< 5,9 \cdot 10^{-7}$ | $< 1,6 \cdot 10^{-7}$ | <b>Pb</b>       | $8,8 \cdot 10^{-6}$ | $1,2 \cdot 10^{-7}$   |
| <b>Ag</b>       | $7,8 \cdot 10^{-6}$   | $3,5 \cdot 10^{-6}$   | <b>Bi</b>       | $8,2 \cdot 10^{-5}$ | $1,2 \cdot 10^{-5}$   |
| <b>Cd</b>       | -                     | $< 4,2 \cdot 10^{-7}$ | <b>Th</b>       | $1,5 \cdot 10^{-7}$ | $< 2,4 \cdot 10^{-7}$ |
| <b>In</b>       | $< 4,8 \cdot 10^{-7}$ | $< 1,5 \cdot 10^{-7}$ | <b>U</b>        | $1,1 \cdot 10^{-7}$ | $< 5,5 \cdot 10^{-8}$ |



Table S9 – Impurity compositions of the melt and the LBO crystal grown by TSSG method using purified MoO<sub>3</sub>, based on the results of ICP-MS analysis.

| Elements  | Melt                  | Crystal               | Elements  | Melt                  | Crystal               |
|-----------|-----------------------|-----------------------|-----------|-----------------------|-----------------------|
|           | wt. %                 | wt. %                 |           | wt. %                 | wt. %                 |
| <b>Be</b> | $3,6 \cdot 10^{-6}$   | $3,0 \cdot 10^{-6}$   | <b>Sn</b> | $< 2,2 \cdot 10^{-5}$ | $8,3 \cdot 10^{-5}$   |
| <b>Na</b> | $8,5 \cdot 10^{-4}$   | $4,7 \cdot 10^{-5}$   | <b>Sb</b> | $< 1,7 \cdot 10^{-6}$ | $2,8 \cdot 10^{-5}$   |
| <b>Mg</b> | $1,2 \cdot 10^{-4}$   | $1,5 \cdot 10^{-5}$   | <b>Te</b> | $< 2,7 \cdot 10^{-5}$ | $6,0 \cdot 10^{-5}$   |
| <b>Al</b> | $< 1,4 \cdot 10^{-5}$ | $< 1,1 \cdot 10^{-5}$ | <b>Cs</b> | $1,3 \cdot 10^{-5}$   | $< 4,7 \cdot 10^{-7}$ |
| <b>Si</b> | $< 2,9 \cdot 10^{-4}$ | $8,6 \cdot 10^{-4}$   | <b>Ba</b> | $1,0 \cdot 10^{-4}$   | $1,2 \cdot 10^{-5}$   |
| <b>K</b>  | $< 2,8 \cdot 10^{-5}$ | $< 2,2 \cdot 10^{-5}$ | <b>La</b> | $7,4 \cdot 10^{-7}$   | $1,5 \cdot 10^{-6}$   |
| <b>Ca</b> | $1,7 \cdot 10^{-4}$   | $< 2,1 \cdot 10^{-5}$ | <b>Ce</b> | $1,0 \cdot 10^{-6}$   | $3,2 \cdot 10^{-6}$   |
| <b>Sc</b> | $5,5 \cdot 10^{-7}$   | $< 1,5 \cdot 10^{-7}$ | <b>Pr</b> | $< 6,4 \cdot 10^{-8}$ | $5,0 \cdot 10^{-7}$   |
| <b>Ti</b> | -                     | $1,9 \cdot 10^{-4}$   | <b>Nd</b> | $< 2,6 \cdot 10^{-7}$ | $< 4,1 \cdot 10^{-7}$ |
| <b>V</b>  | $< 2,4 \cdot 10^{-5}$ | $< 1,9 \cdot 10^{-5}$ | <b>Sm</b> | $1,8 \cdot 10^{-7}$   | $< 1,2 \cdot 10^{-8}$ |
| <b>Cr</b> | $1,4 \cdot 10^{-5}$   | $2,3 \cdot 10^{-5}$   | <b>Eu</b> | $1,6 \cdot 10^{-7}$   | $< 1,2 \cdot 10^{-8}$ |
| <b>Mn</b> | $3,5 \cdot 10^{-5}$   | $3,3 \cdot 10^{-6}$   | <b>Gd</b> | $9,1 \cdot 10^{-8}$   | $2,4 \cdot 10^{-7}$   |
| <b>Fe</b> | $7,8 \cdot 10^{-5}$   | $7,2 \cdot 10^{-5}$   | <b>Tb</b> | $2,6 \cdot 10^{-7}$   | $1,9 \cdot 10^{-8}$   |
| <b>Co</b> | $4,3 \cdot 10^{-7}$   | $< 2,5 \cdot 10^{-7}$ | <b>Dy</b> | $< 1,5 \cdot 10^{-8}$ | $3,7 \cdot 10^{-8}$   |
| <b>Ni</b> | $< 3,3 \cdot 10^{-5}$ | $< 2,7 \cdot 10^{-5}$ | <b>Ho</b> | $4,3 \cdot 10^{-8}$   | $1,0 \cdot 10^{-8}$   |
| <b>Cu</b> | $7,4 \cdot 10^{-6}$   | $1,8 \cdot 10^{-6}$   | <b>Er</b> | $< 1,5 \cdot 10^{-8}$ | $< 1,2 \cdot 10^{-8}$ |
| <b>Zn</b> | $< 3,5 \cdot 10^{-5}$ | $< 2,8 \cdot 10^{-5}$ | <b>Tm</b> | $< 1,5 \cdot 10^{-8}$ | $< 1,2 \cdot 10^{-8}$ |
| <b>Ga</b> | $< 1,3 \cdot 10^{-6}$ | $< 1,0 \cdot 10^{-6}$ | <b>Yb</b> | $< 1,5 \cdot 10^{-8}$ | $< 1,2 \cdot 10^{-8}$ |
| <b>Ge</b> | $< 2,1 \cdot 10^{-6}$ | $< 1,7 \cdot 10^{-6}$ | <b>Lu</b> | $1,6 \cdot 10^{-8}$   | $< 1,2 \cdot 10^{-8}$ |
| <b>As</b> | $2,7 \cdot 10^{-5}$   | $4,3 \cdot 10^{-5}$   | <b>Hf</b> | $< 1,5 \cdot 10^{-8}$ | $2,1 \cdot 10^{-7}$   |
| <b>Se</b> | $< 3,3 \cdot 10^{-5}$ | $< 2,7 \cdot 10^{-5}$ | <b>Ta</b> | $< 5,4 \cdot 10^{-8}$ | $< 4,3 \cdot 10^{-8}$ |
| <b>Rb</b> | $5,9 \cdot 10^{-6}$   | $< 1,9 \cdot 10^{-6}$ | <b>W</b>  | $1,0 \cdot 10^{-4}$   | $1,7 \cdot 10^{-5}$   |
| <b>Sr</b> | $4,0 \cdot 10^{-6}$   | $< 1,8 \cdot 10^{-6}$ | <b>Re</b> | $1,0 \cdot 10^{-6}$   | $1,1 \cdot 10^{-6}$   |
| <b>Y</b>  | $3,8 \cdot 10^{-6}$   | $< 5,0 \cdot 10^{-7}$ | <b>Os</b> | $< 1,5 \cdot 10^{-8}$ | $< 1,2 \cdot 10^{-8}$ |
| <b>Zr</b> | $< 3,3 \cdot 10^{-6}$ | $< 2,6 \cdot 10^{-6}$ | <b>Ir</b> | $< 1,2 \cdot 10^{-7}$ | $< 9,7 \cdot 10^{-8}$ |
| <b>Nb</b> | $6,6 \cdot 10^{-5}$   | $< 2,6 \cdot 10^{-7}$ | <b>Pt</b> | $7,9 \cdot 10^{-4}$   | $7,4 \cdot 10^{-6}$   |
| <b>Mo</b> | -                     | $< 2,9 \cdot 10^{-5}$ | <b>Au</b> | $1,3 \cdot 10^{-7}$   | $9,8 \cdot 10^{-8}$   |

| <b>Elements</b> | <b>Melt</b>           | <b>Crystal</b>        | <b>Elements</b> | <b>Melt</b>           | <b>Crystal</b>        |
|-----------------|-----------------------|-----------------------|-----------------|-----------------------|-----------------------|
|                 | wt. %                 | wt. %                 |                 | wt. %                 | wt. %                 |
| <b>Ru</b>       | $< 7,3 \cdot 10^{-7}$ | $< 5,8 \cdot 10^{-7}$ | <b>Hg</b>       | $< 3,8 \cdot 10^{-6}$ | $2,4 \cdot 10^{-5}$   |
| <b>Rh</b>       | $4,2 \cdot 10^{-6}$   | $7,2 \cdot 10^{-7}$   | <b>Tl</b>       | $2,6 \cdot 10^{-7}$   | $2,4 \cdot 10^{-7}$   |
| <b>Pd</b>       | $< 2,6 \cdot 10^{-7}$ | $< 2,1 \cdot 10^{-7}$ | <b>Pb</b>       | $7,9 \cdot 10^{-6}$   | $2,1 \cdot 10^{-7}$   |
| <b>Ag</b>       | $2,7 \cdot 10^{-7}$   | $< 1,5 \cdot 10^{-7}$ | <b>Bi</b>       | $< 5,3 \cdot 10^{-6}$ | $3,8 \cdot 10^{-5}$   |
| <b>Cd</b>       | -                     | $< 1,1 \cdot 10^{-6}$ | <b>Th</b>       | $8,3 \cdot 10^{-8}$   | $< 1,2 \cdot 10^{-8}$ |
| <b>In</b>       | $< 4,6 \cdot 10^{-7}$ | $< 3,7 \cdot 10^{-7}$ | <b>U</b>        | $2,3 \cdot 10^{-8}$   | $< 1,2 \cdot 10^{-8}$ |

Table S10 – Impurity compositions of the as-purified MoO<sub>3</sub>, and MoO<sub>3</sub> from LANHIT Ltd., which were used for NaLn(MoO<sub>4</sub>)<sub>2</sub> crystal growth based on the results of ICP-MS analysis.

| Elements  | As-purified           | LANHIT Ltd.           | Elements  | As-purified           | LANHIT Ltd.           |
|-----------|-----------------------|-----------------------|-----------|-----------------------|-----------------------|
|           | wt.%                  | wt.%                  |           | wt.%                  | wt.%                  |
| <b>Li</b> | $< 3.5 \cdot 10^{-5}$ | $< 3.4 \cdot 10^{-6}$ | <b>Sb</b> | $2.7 \cdot 10^{-6}$   | $2.2 \cdot 10^{-5}$   |
| <b>Be</b> | $< 2.1 \cdot 10^{-6}$ | $< 1.9 \cdot 10^{-6}$ | <b>Te</b> | $< 1.6 \cdot 10^{-5}$ | $2.6 \cdot 10^{-4}$   |
| <b>B</b>  | $< 2.1 \cdot 10^{-6}$ | $< 5.9 \cdot 10^{-6}$ | <b>Cs</b> | $4.1 \cdot 10^{-6}$   | $7.1 \cdot 10^{-5}$   |
| <b>Na</b> | $4.4 \cdot 10^{-5}$   | $9.8 \cdot 10^{-3}$   | <b>Ba</b> | $3.5 \cdot 10^{-5}$   | $5.3 \cdot 10^{-5}$   |
| <b>Mg</b> | $< 1.0 \cdot 10^{-5}$ | $7.8 \cdot 10^{-5}$   | <b>La</b> | $< 9.8 \cdot 10^{-8}$ | $4.5 \cdot 10^{-7}$   |
| <b>Al</b> | $< 2.2 \cdot 10^{-5}$ | $1.6 \cdot 10^{-5}$   | <b>Ce</b> | $< 6.4 \cdot 10^{-8}$ | $< 3.7 \cdot 10^{-7}$ |
| <b>Si</b> | $< 2.1 \cdot 10^{-4}$ | $< 3.9 \cdot 10^{-4}$ | <b>Pr</b> | $6.6 \cdot 10^{-7}$   | $8.2 \cdot 10^{-7}$   |
| <b>K</b>  | $< 2.0 \cdot 10^{-5}$ | $8.9 \cdot 10^{-3}$   | <b>Nd</b> | $1.4 \cdot 10^{-7}$   | $< 6.3 \cdot 10^{-7}$ |
| <b>Ca</b> | $< 2.5 \cdot 10^{-5}$ | $1.6 \cdot 10^{-4}$   | <b>Sm</b> | $< 2.1 \cdot 10^{-8}$ | $< 1.9 \cdot 10^{-8}$ |
| <b>Sc</b> | $< 9.3 \cdot 10^{-7}$ | $< 1.0 \cdot 10^{-6}$ | <b>Eu</b> | $< 2.1 \cdot 10^{-8}$ | $< 1.1 \cdot 10^{-7}$ |
| <b>V</b>  | $< 1.2 \cdot 10^{-6}$ | $< 6.7 \cdot 10^{-6}$ | <b>Gd</b> | $< 9.9 \cdot 10^{-8}$ | $1.1 \cdot 10^{-6}$   |
| <b>Cr</b> | $< 1.3 \cdot 10^{-6}$ | $5.4 \cdot 10^{-4}$   | <b>Tb</b> | $6.4 \cdot 10^{-6}$   | $7.7 \cdot 10^{-8}$   |
| <b>Mn</b> | $< 2.3 \cdot 10^{-6}$ | $2.1 \cdot 10^{-5}$   | <b>Dy</b> | $< 2.1 \cdot 10^{-8}$ | $9.6 \cdot 10^{-8}$   |
| <b>Fe</b> | $< 5.9 \cdot 10^{-6}$ | $1.7 \cdot 10^{-3}$   | <b>Ho</b> | $1.4 \cdot 10^{-7}$   | $1.0 \cdot 10^{-7}$   |
| <b>Co</b> | $< 3.4 \cdot 10^{-7}$ | $3.3 \cdot 10^{-5}$   | <b>Er</b> | $8.6 \cdot 10^{-8}$   | $< 1.9 \cdot 10^{-8}$ |
| <b>Ni</b> | $< 7.2 \cdot 10^{-7}$ | $< 2.0 \cdot 10^{-6}$ | <b>Tm</b> | $4.0 \cdot 10^{-8}$   | $4.8 \cdot 10^{-8}$   |
| <b>Cu</b> | $5.4 \cdot 10^{-5}$   | $6.4 \cdot 10^{-5}$   | <b>Yb</b> | $< 2.1 \cdot 10^{-8}$ | $< 1.9 \cdot 10^{-8}$ |
| <b>Zn</b> | $< 3.4 \cdot 10^{-6}$ | $1.6 \cdot 10^{-5}$   | <b>Lu</b> | $< 1.4 \cdot 10^{-7}$ | $< 3.8 \cdot 10^{-7}$ |
| <b>Ga</b> | $< 5.8 \cdot 10^{-7}$ | $< 7.9 \cdot 10^{-7}$ | <b>Hf</b> | $< 3.9 \cdot 10^{-7}$ | $< 3.1 \cdot 10^{-7}$ |
| <b>Ge</b> | $< 1.1 \cdot 10^{-6}$ | $< 6.7 \cdot 10^{-7}$ | <b>Ta</b> | $< 2.8 \cdot 10^{-5}$ | $7.7 \cdot 10^{-8}$   |
| <b>As</b> | $< 2.0 \cdot 10^{-5}$ | $< 2.0 \cdot 10^{-5}$ | <b>W</b>  | $2.1 \cdot 10^{-4}$   | $4.7 \cdot 10^{-3}$   |
| <b>Se</b> | $< 7.8 \cdot 10^{-6}$ | $< 2.4 \cdot 10^{-5}$ | <b>Re</b> | $< 2.1 \cdot 10^{-8}$ | $1.7 \cdot 10^{-5}$   |
| <b>Rb</b> | $1.8 \cdot 10^{-5}$   | $5.1 \cdot 10^{-4}$   | <b>Os</b> | $< 2.1 \cdot 10^{-8}$ | $< 1.9 \cdot 10^{-8}$ |
| <b>Sr</b> | $< 4.5 \cdot 10^{-6}$ | $< 3.4 \cdot 10^{-6}$ | <b>Ir</b> | $< 2.1 \cdot 10^{-8}$ | $< 5.9 \cdot 10^{-8}$ |
| <b>Y</b>  | $< 4.7 \cdot 10^{-7}$ | $< 4.0 \cdot 10^{-7}$ | <b>Pt</b> | $< 3.7 \cdot 10^{-6}$ | $3.5 \cdot 10^{-6}$   |
| <b>Zr</b> | $< 1.3 \cdot 10^{-5}$ | $5.5 \cdot 10^{-7}$   | <b>Au</b> | $< 2.1 \cdot 10^{-8}$ | $< 2.0 \cdot 10^{-7}$ |
| <b>Nb</b> | $1.4 \cdot 10^{-4}$   | $2.2 \cdot 10^{-4}$   | <b>Hg</b> | $< 8.7 \cdot 10^{-6}$ | $3.7 \cdot 10^{-5}$   |
| <b>Ru</b> | $< 3.8 \cdot 10^{-7}$ | $< 5.9 \cdot 10^{-7}$ | <b>Tl</b> | $4.5 \cdot 10^{-8}$   | $1.3 \cdot 10^{-6}$   |

| Elements  | As-purified           | LANHIT Ltd.           | Elements  | As-purified           | LANHIT Ltd.         |
|-----------|-----------------------|-----------------------|-----------|-----------------------|---------------------|
|           | wt. %                 | wt. %                 |           | wt. %                 | wt. %               |
| <b>Rh</b> | $< 6.6 \cdot 10^{-7}$ | $< 1.2 \cdot 10^{-7}$ | <b>Pb</b> | $9.4 \cdot 10^{-6}$   | $2.2 \cdot 10^{-6}$ |
| <b>Pd</b> | $< 5.6 \cdot 10^{-8}$ | $< 3.2 \cdot 10^{-7}$ | <b>Bi</b> | $< 2.1 \cdot 10^{-8}$ | $5.3 \cdot 10^{-5}$ |
| <b>Ag</b> | $< 7.7 \cdot 10^{-8}$ | $< 6.5 \cdot 10^{-7}$ | <b>Th</b> | $< 2.1 \cdot 10^{-8}$ | $3.8 \cdot 10^{-8}$ |
| <b>In</b> | $< 7.0 \cdot 10^{-8}$ | $< 6.3 \cdot 10^{-7}$ | <b>U</b>  | $3.8 \cdot 10^{-8}$   | $1.5 \cdot 10^{-6}$ |
| <b>Sn</b> | $8.7 \cdot 10^{-6}$   | $1.3 \cdot 10^{-4}$   |           |                       |                     |
